# Supplementary material for: Bimodal silicone interpenetrating networks sequentially built as electroactive dielectric elastomers
Source: Royal Society of Chemistry journal article supplement (doi:10.1039/c5tc01391g), 2015-01-01
Supplement: c5tc01391g1.pdf [file c5tc01391g1.pdf]

## Supporting information

for Journal of Materials Chemistry C, See DOI: 10.1039/b000000x/

### Bimodal silicone interpenetrating networks sequentially built as electroactive dielectric elastomers

*C. Tugui, G. Stiubianu, M. Iacob, C. Ursu, A. Bele, S. Vlad and M. Cazacu*

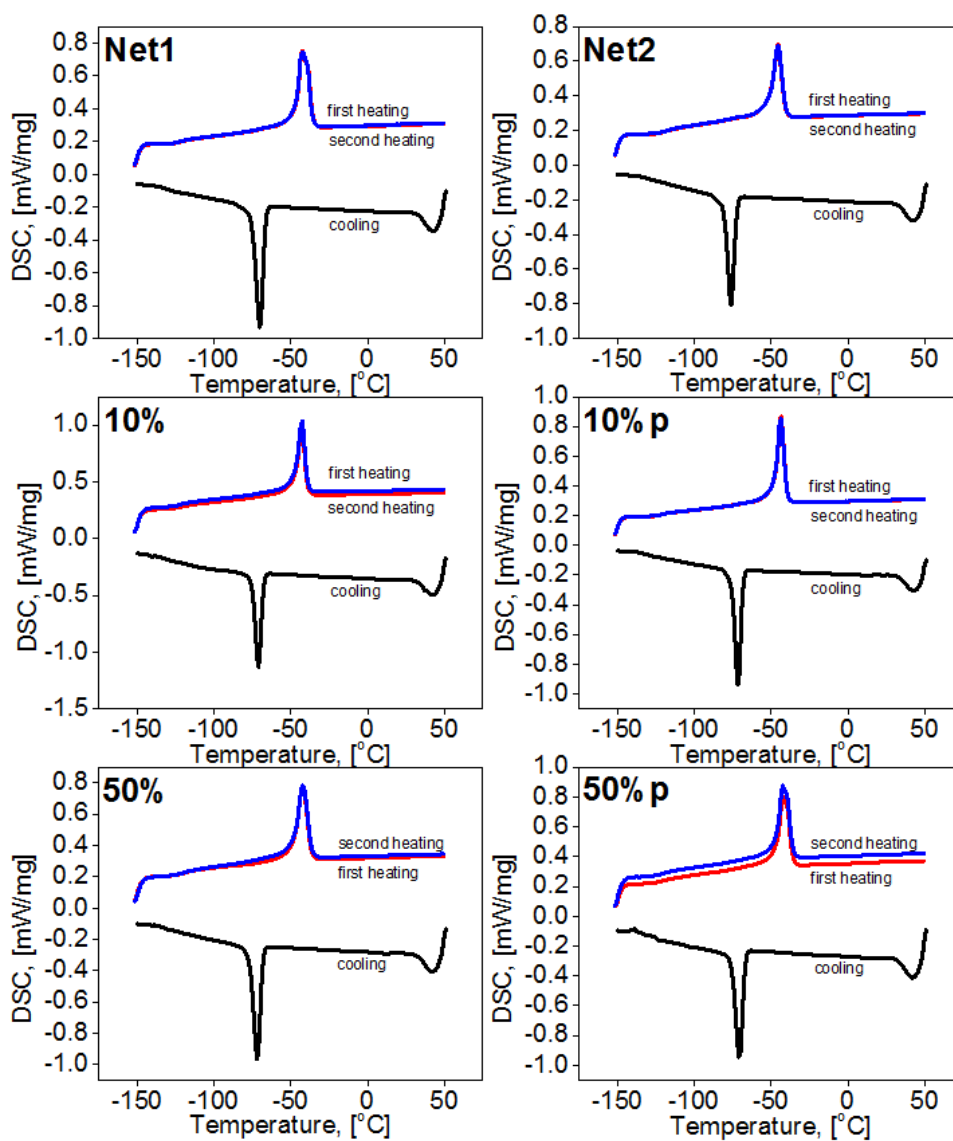

**Figure S1.** DSC traces for some of the prepared IPNs

**Table S1.** The main parameters of DSC curves

| Sample  | T <sub>g</sub> <sub>h1</sub> [°C] | T <sub>g</sub> <sub>h2</sub> [°C] | T <sub>m</sub> <sub>h1</sub> [°C] | T <sub>m</sub> <sub>h1</sub> [°C] | T <sub>m</sub> <sub>h2</sub> [°C] | T <sub>m</sub> <sub>h2</sub> [°C] | T <sub>c</sub> [°C] | Area h1 [J/g] | Area h2 [J/g] | Area c [J/g] |
|---------|-----------------------------------|-----------------------------------|-----------------------------------|-----------------------------------|-----------------------------------|-----------------------------------|---------------------|---------------|---------------|--------------|
| Net1    | -121.9                            | -122.2                            | -42.3                             | -39.1                             | -42.1                             | -39.7                             | -70.0               | 23.9          | 23.6          | -26.7        |
| Net2    | -119.9                            | -120.4                            | -45.4                             |                                   | -45.5                             |                                   | -76.1               | 19.0          | 19.3          | -21.0        |
| IPN-10  | -121.7                            | -121.9                            | -42.7                             |                                   | -42.7                             |                                   | -71.1               | 23.5          | 23.9          | -23.9        |
| IPN-10p | -121.4                            | -122.6                            | -43.7                             |                                   | -43.8                             |                                   | -71.4               | 21.3          | 21.4          | -22.9        |
| IPN-50  | -121.2                            | -121.1                            | -42.2                             |                                   | -42.1                             |                                   | -71.8               | 23.5          | 23.1          | -24.2        |
| IPN-50p | -119.8                            | -119.6                            | -42.6                             | -40.3                             | -42.5                             | -40.0                             | -70.6               | 23.8          | 24.7          | -25.0        |

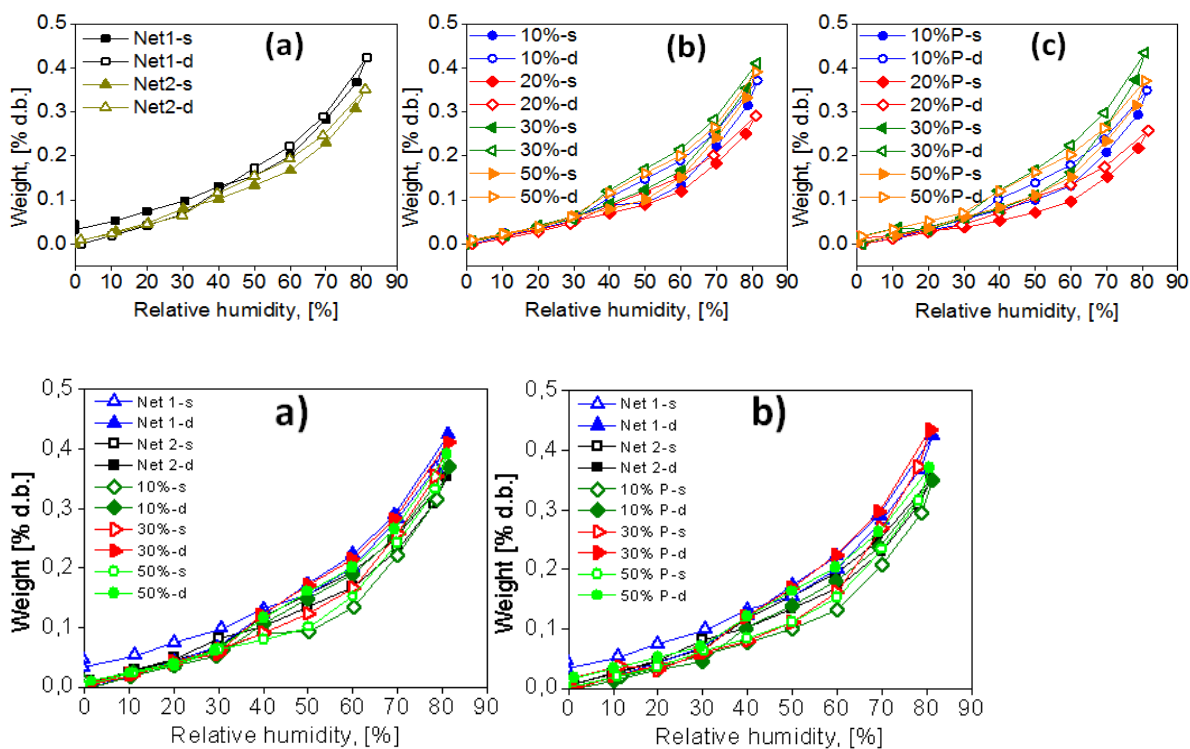

**Figure S2.** Sorption-desorption isotherms registered in dynamic regime at room temperature for IPNs as compared with references Net1 and Net1.

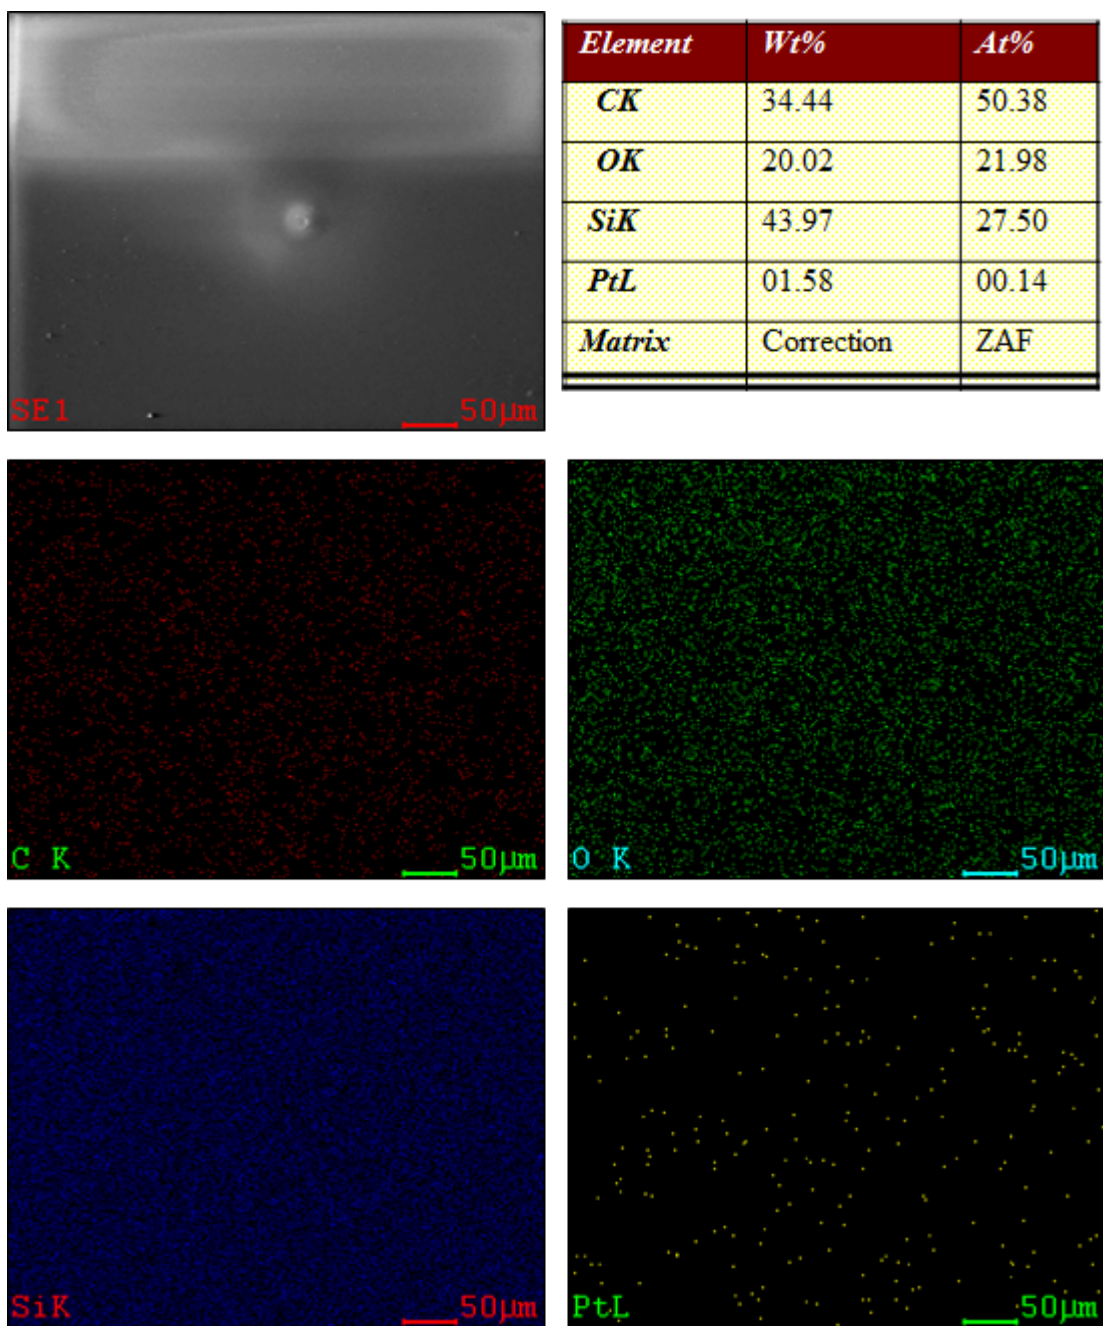

**Figure S3.** Elemental composition and mapping determined by Energy-dispersive X-ray spectroscopy (EDX) (EDX system available on Scanning Electron Microscope type Quanta 200).

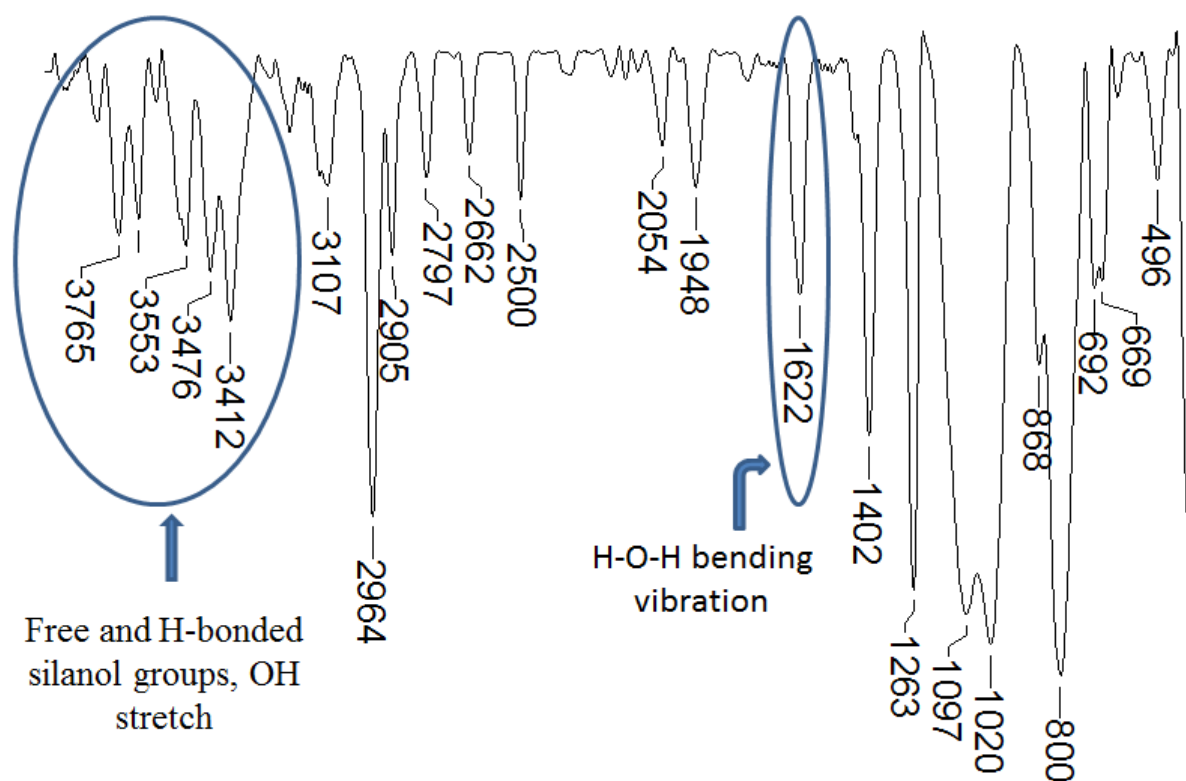

**Figure S4.** FTIR spectrum of Net2 revealing presence of polar OH groups<sup>1-3</sup> (recorded with a Bruker Vertex 70 FTIR spectrometer in transmission mode on crushed sample by grinding in liquid nitrogen and incorporated into KBr pellets).

**Table S2.** The ratio between the dielectric loss and dielectric constant,  $\tan \delta$  ( $\tan \delta = \epsilon''/\epsilon'$ )

| Sample  | $\epsilon''/\epsilon'$ | $\epsilon''/\epsilon' \cdot 10^{-3}$ |
|---------|------------------------|--------------------------------------|
|         | at 1 Hz                | at $10^4$ Hz                         |
| Net1    | 0.19                   | 0.64                                 |
| Net2    | 2.58                   | 0.30                                 |
| IPN-10  | 0.45                   | 0.66                                 |
| IPN-10p | 0.69                   | 0.50                                 |
| IPN-20  | 1.14                   | 1.30                                 |
| IPN-20p | 1.56                   | 1.11                                 |
| IPN-30  | 1.03                   | 0.57                                 |
| IPN-30p | 1.31                   | 0.75                                 |
| IPN-50  | 5.84                   | 1.00                                 |
| IPN-50p | 1.50                   | 0.30                                 |

## References

- 1 Philip J. Launer, *Infrared analysis of organosilicon compounds: spectra-structure correlations in Silicone Compounds*, Ed. B. Arkles et al Petrarch Systems, 1987
- 2 Bhaskar J. Saikia, G. Parthasarathy, N. C. Sarmah, *Fourier Transform Infrared Spectroscopic Characterization of Dergaon H5 Chondrite: Evidence of Aliphatic Organic Compound*, *Nature and Science*, 2009, 7(5).
- 3 John Coates, *Interpretation of Infrared Spectra, A Practical Approach in Encyclopedia of Analytical Chemistry*, John Wiley & Sons Ltd, Chichester, 2000, 10815–10837.
